# Supplementary material for: Increasing STEM Transfer Readiness Among Underrepresented Minoritized Two-Year College Students: Examining Course-Taking Patterns, Experiences, and Interventions
Source: Frontiers journal article supplement (doi:10.3389/feduc.2021.667091), 2021-06-09
Supplement: Data_Sheet_1.PDF [file Data_Sheet_1.PDF]

**Madison College STEM Program List**

| Primary Academic Plan Code by Term             |
|------------------------------------------------|
| 100072 - Biotechnology Laboratory Tech (M)     |
| 100072-WL - Biotechnology Laboratory-WL (M)    |
| 101071 - CIS-Programmer/Analyst (M)            |
| 101072 - CIS-Computer Systems Adm Spec (M)     |
| 101077 - CIS-Web Analyst/Programmer (M)        |
| 101078 - CIS-Network Specialist (M)            |
| 101078-WL - CIS-Network Specialist-WL (M)      |
| 101502 - IT-Network Specialist (M)             |
| 101502-WL - IT-Network Specialist-WL (M)       |
| 101503 - IT-Network Security Specialist (M)    |
| 101503-WL - IT-Network Security Spec-WL (M)    |
| 101512 - IT-Cybersecurity Specialist (M)       |
| 101512-WL - IT-Cybersecurity Special-WL (M)    |
| 101521 - IT-Programmer/Analyst (M)             |
| 1015210 - IT-Front End Developer (M)           |
| 101521-WL - IT-Programmer/Analyst-WL (M)       |
| 101524 - IT-Web Software Developer (M)         |
| 101524-WL - IT-Web Software Developer-WL (M)   |
| 101528 - IT-Mobile Applic Developer (M)        |
| 101528-WL - IT-Mobile Applic Developer-WL (M)  |
| 101547 - IT-Systems Admin Specialist (M)       |
| 101547-WL - IT-Computer Systems Admn-WL (M)    |
| 101571 - IT-Cloud Support Associate (M)        |
| 101571-WL - IT-Cloud Support Associate-WL (M)  |
| 106051 - Electronics (M)                       |
| 106051-WL - Electronics-WL (M)                 |
| 106061 - Mechanical Design Technology (M)      |
| 106061-WL - Mechanical Design Tech-WL (M)      |
| 106071 - Civil Engineering Technology (M)      |
| 106071-WL - Civil Engineering Tech-WL (M)      |
| 106078 - Civil Engineering Technology (M)      |
| 106141 - Architectural Technology (M)          |
| 106141-TR - Architectural Technology (M)       |
| 106141-WL - Architectural Technology-WL (M)    |
| 106191 - Plastics Technology (M)               |
| 106201 - Electromechanical Technology (M)      |
| 106283 - Automated Manufacturing System (M)    |
| 106283-WL - Automated Mfg System-WL (M)        |
| 106621 - Electrical Engineering Technol (M)    |
| 106621-WL - Electrical Engineering Tech-WL (M) |
| 208001-E - Liberal Arts Transfer (M)           |
| 208001-S - Liberal Arts Transfer (M)           |
| 208001-SAC - Liberal Arts Transfer-AC (M)      |
| 208001-SET - Liberal Arts Transfer (M)         |
| 208002-E - LAT-S Engineering (M)               |
| 208002-HE - LAT-S Pre-Professional Health (M)  |
| 208002-S - LAT-S Science/Math/Technology (M)   |
| ENGINEE-EX - Architecture and Engineering (M)  |
| INFOTEC-EX - Information Technology (M)        |
| SCIMATH-EX - Science, Math, Nat Resources (M)  |
